# Supplementary material
Source: bioRxiv or medRxiv preprint supplement (https://www.biorxiv.org/highwire/filestream/110500/field_highwire_adjunct_files/5/362277-6.pdf)
Supplement: Supplementary file [file 362277-6.pdf]

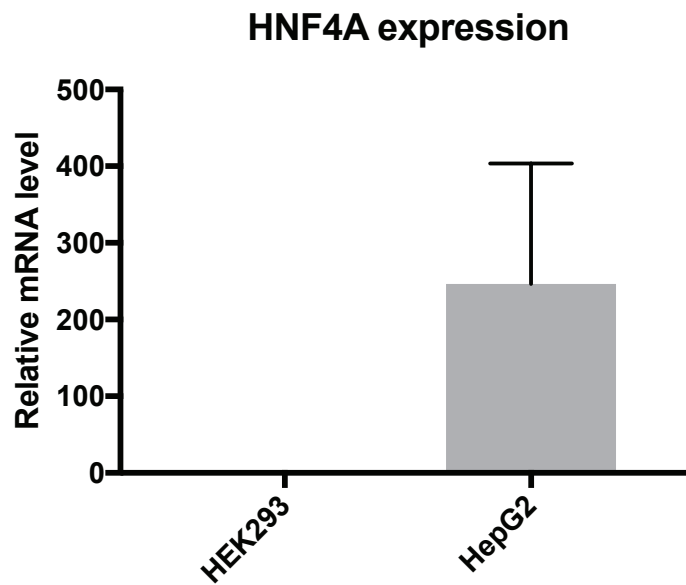

**Figure S5. *HNF4A* mRNA expression in human kidney and liver cells.** *HNF4A* expression in HEK293 and HepG2 cells was calculated as an average of three biological replicates. *GAPDH* and *PPIA* were used for normalization of mRNA expression. Statistical significance for *HNF4A* HepG2 versus HEK293 was  $p < 0.00005$  using an unpaired *t*-test.
